# Supplementary material for: Atg5 Regulates Phenethyl Isothiocyanate–Induced Autophagic and Apoptotic Cell Death in Human Prostate Cancer Cells
Source: Oxford University Press journal article supplement (doi:10.1158/0008-5472.can-08-4344), 2009-03-31
Supplement: 00085472can084344-sup-sfig_leg1.pdf [file 00085472can084344-sup-sfig_leg1.pdf]

### **Legend to Supplemental Figure**

**Fig. S1.** Immunoblotting for Rheb, phospho-(T389)-p70s6k, and LC3 using lysates from PC-3 cells transiently transfected with the empty-vector or vector encoding Rheb and treated with DMSO (control) or 5  $\mu\text{mol/L}$  PEITC for 9 h. The blots were stripped and re-probed with anti-actin antibody to ensure equal protein loading. Densitometric quantitation relative to DMSO-treated empty-vector transfected control cells, after correction for actin loading, is shown on top of the immunoreactive band.
